# Supplementary material
Source: PubMed Central journal article supplement (PMC4039209)
Supplement: NIHMS583472-supplement-Online_Supplment.pdf [file NIHMS583472-supplement-Online_Supplment.pdf]

# Online-only Supplement

## Association of Parkinson Disease Risk Loci with Mild Parkinsonian Signs in Older Persons

Joshua M. Shulman, MD, PhD, Lei Yu, PhD, Aron S. Buchman, MD, Denis A. Evans, MD, Julie A. Schneider, MD, David A. Bennett, MD, Philip L. De Jager, MD, PhD

|                                                                                  |   |
|----------------------------------------------------------------------------------|---|
| eTable 1: PD SNPs evaluated in this study .....                                  | 2 |
| eFigure 1: MAPT association with global parkinsonism .....                       | 3 |
| eTable 2: Associations with baseline global parkinsonism, removing PD cases..... | 4 |
| eTable 3: Associations with parkinsonian features .....                          | 5 |
| eTable 4: Associations with other motor traits .....                             | 6 |
| eTable 5: Associations with nigral pathology.....                                | 7 |
| eTable 6: Associations with AD and cerebrovascular pathology.....                | 8 |

**eTable 1 PD SNPs evaluated in this study.**

| <b>LOCUS</b>  | <b>SNP</b> | <b>A1</b> | <b>A2</b> | <b>FREQ</b> | <b>REFS</b> |
|---------------|------------|-----------|-----------|-------------|-------------|
| PARK16        | rs11240572 | C*        | A         | 0.97        | 1,2         |
| STK39         | rs2102808  | G         | T*        | 0.87        | 1,3         |
| ACMSD-TMEM163 | rs6710823  | G         | A*        | 0.88        | 1,3         |
| MCCC1         | rs11711441 | G*        | A         | 0.85        | 1,3         |
| NMD3          | rs34016896 | C         | T*        | 0.69        | 4           |
| SNCA          | rs356220   | C         | T*        | 0.54        | 1,5         |
| GAK           | rs1564282  | C         | T*        | 0.89        | 1,6         |
| BST1          | rs4698412  | A*        | G         | 0.56        | 1,7         |
| FAM47E-STBD1  | rs6812193  | C*        | T         | 0.63        | 1,4         |
| HLA-DRB5      | rs3129882  | A         | G*        | 0.56        | 1,8         |
| GPNMB         | rs156429   | T*        | C         | 0.60        | 1,4         |
| FGF20         | rs591323   | G*        | A         | 0.73        | 1,4         |
| CCDC62-HIP1R  | rs12817488 | G         | A*        | 0.62        | 1,3         |
| LRRK2         | rs1491942  | C         | G*        | 0.81        | 1,3         |
| SETD1A-STX1B  | rs4889603  | A         | G*        | 0.60        | 1,4         |
| MAPT          | rs2942168  | A         | G*        | 0.20        | 1,3         |
| SREBF1-RAI1   | rs11868035 | G*        | A         | 0.71        | 5           |
| RIT2-SYT4     | rs12456492 | G*        | A         | 0.71        | 7           |

SNP, single nucleotide polymorphism; A1, reference allele used for analyses in this study; A2, alternative allele; FREQ, estimated allele frequency of A1 from dosage data. REFS, References. Under the A1/A2 columns, the asterisk denotes the published risk allele for PD.

1. Lill CM, Roehr JT, McQueen MB, et al. Comprehensive research synopsis and systematic meta-analyses in Parkinson's disease genetics: The PDGene database. *PLoS Genet.* 2012 Mar;8(3):e1002548.
2. Simon-Sanchez J, Schulte C, Bras JM, et al. Genome-wide association study reveals genetic risk underlying Parkinson's disease. *Nat Genet.* 2009 Dec;41(12):1308–12.
3. International Parkinson Disease Genomics Consortium, Nalls MA, Plagnol V, et al. Imputation of sequence variants for identification of genetic risks for Parkinson's disease: a meta-analysis of genome-wide association studies. *Lancet.* 2011 Feb 19;377(9766):641–9.
4. International Parkinson's Disease Genomics Consortium IPDGC, Wellcome Trust Case Control Consortium 2 WTCCC2. A two-stage meta-analysis identifies several new loci for Parkinson's disease. *PLoS Genet.* 2011 Jun;7(6):e1002142.
5. Do CB, Tung JY, Dorfman E, et al. Web-Based Genome-Wide Association Study Identifies Two Novel Loci and a Substantial Genetic Component for Parkinson's Disease. *PLoS Genet.* 2011 Jun 23;7(6):e1002141.
6. Pankratz N, Wilk JB, Latourelle JC, et al. Genomewide association study for susceptibility genes contributing to familial Parkinson disease. *Hum Genet.* 2009 Jan;124(6):593–605.
7. Pankratz N, Beecham GW, DeStefano AL, et al. Meta-analysis of Parkinson's Disease: Identification of a novel locus, RIT2. *Ann Neurol.* 2012 Mar;71(3):370–84.
8. Hamza TH, Zabetian CP, Tenesa A, et al. Common genetic variation in the HLA region is associated with late-onset sporadic Parkinson's disease. *Nat Genet.* 2010 Aug 15.

**eFigure 1: MAPT association with global parkinsonism.**

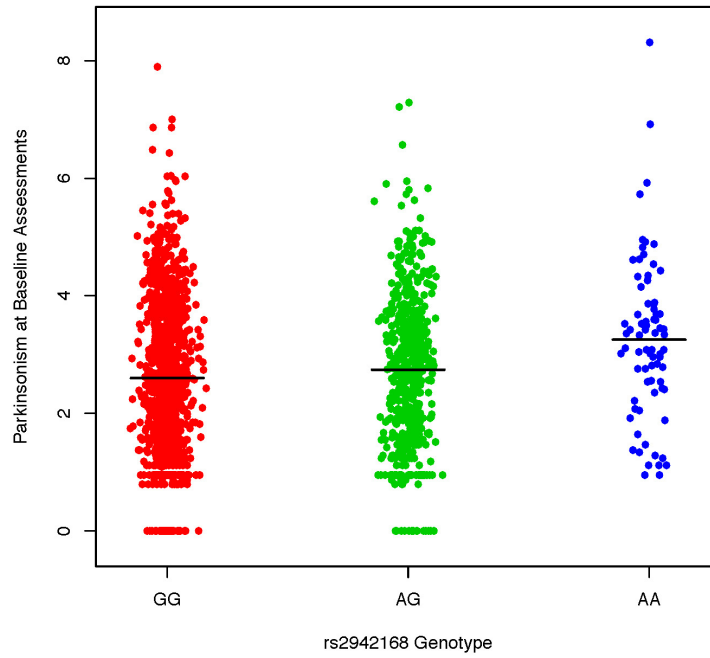

| rs2942168_A | N    | mean global parkinsonism (SD) |
|-------------|------|-------------------------------|
| 0           | 1077 | 2.60 (1.30)                   |
| 1           | 526  | 2.74 (1.27)                   |
| 2           | 75   | 3.25 (1.36)                   |

**eTable 2: Associations with baseline global parkinsonism, removing PD cases.**

| <b>LOCUS</b> | <b>SNP</b> | <b>MODEL</b>                 |
|--------------|------------|------------------------------|
| PARK16       | rs11240572 | -0.094 (0.150, 0.529)        |
| STK39        | rs2102808  | -0.013 (0.060, 0.832)        |
| ACMSD        | rs6710823  | 0.236 (0.208, 0.256)         |
| MCCC1        | rs11711441 | 0.003 (0.057, 0.959)         |
| NMD3         | rs34016896 | 0.028 (0.044, 0.528)         |
| SNCA         | rs356220   | 0.005 (0.046, 0.922)         |
| GAK          | rs1564282  | -0.028 (0.062, 0.650)        |
| BST1         | rs4698412  | 0.010 (0.040, 0.809)         |
| FAM47E       | rs6812193  | -0.069 (0.041, 0.091)        |
| HLA-DRB5     | rs3129882  | 0.033 (0.041, 0.416)         |
| GPNMB        | rs156429   | 0.031 (0.041, 0.457)         |
| FGF20        | rs591323   | -0.002 (0.046, 0.970)        |
| CCDC62       | rs12817488 | <b>0.300 (0.104, 0.004)</b>  |
| LRRK2        | rs1491942  | -0.007 (0.050, 0.892)        |
| SETD1A       | rs4889603  | 0.000 (0.040, 0.997)         |
| MAPT         | rs2942168  | <b>0.174 (0.049, 0.0004)</b> |
| SREBF1       | rs11868035 | -0.043 (0.048, 0.374)        |
| RIT2         | rs12456492 | 0.009 (0.043, 0.824)         |

Based on linear regression models examining the level of global parkinsonism to PD SNP genotypes. Estimates (SE, p-value) are based on the effect of increasing dosage of the SNP reference allele, after adjustment for age and gender. Subjects with diagnosis of PD (n=46), either at baseline or subsequent evaluations were excluded.

**eTable 3: Associations with Parkinsonian Features.**

| LOCUS    | SNP        | Bradykinesia                 | Gait                         | Rigidity                     | Tremor                      |
|----------|------------|------------------------------|------------------------------|------------------------------|-----------------------------|
| PARK16   | rs11240572 | -0.082 (0.256, 0.749)        | -0.194 (0.235, 0.410)        | -0.061 (0.296, 0.838)        | 0.391 (0.282, 0.166)        |
| STK39    | rs2102808  | -0.003 (0.101, 0.974)        | -0.044 (0.093, 0.634)        | 0.113 (0.122, 0.358)         | 0.004 (0.111, 0.968)        |
| ACMSD    | rs6710823  | 0.164 (0.352, 0.641)         | 0.219 (0.324, 0.499)         | 0.155 (0.415, 0.709)         | 0.716 (0.387, 0.064)        |
| MCCC1    | rs11711441 | 0.060 (0.096, 0.532)         | -0.010 (0.088, 0.914)        | 0.082 (0.115, 0.476)         | 0.061 (0.105, 0.558)        |
| NMD3     | rs34016896 | 0.040 (0.074, 0.586)         | 0.064 (0.068, 0.350)         | 0.027 (0.088, 0.758)         | 0.098 (0.081, 0.227)        |
| SNCA     | rs356220   | 0.053 (0.078, 0.503)         | 0.025 (0.072, 0.728)         | <b>-0.187 (0.092, 0.043)</b> | -0.126 (0.085, 0.141)       |
| GAK      | rs1564282  | 0.022 (0.106, 0.835)         | -0.099 (0.097, 0.308)        | -0.160 (0.122, 0.189)        | <b>0.264 (0.119, 0.027)</b> |
| BST1     | rs4698412  | -0.030 (0.068, 0.662)        | 0.061 (0.063, 0.333)         | -0.006 (0.080, 0.943)        | 0.030 (0.074, 0.688)        |
| FAM47E   | rs6812193  | -0.121 (0.069, 0.080)        | -0.083 (0.063, 0.189)        | -0.120 (0.081, 0.139)        | 0.063 (0.075, 0.404)        |
| HLA-DRB5 | rs3129882  | 0.016 (0.069, 0.815)         | 0.015 (0.063, 0.817)         | 0.016 (0.081, 0.842)         | 0.107 (0.075, 0.153)        |
| GPNMB    | rs156429   | 0.013 (0.070, 0.848)         | 0.101 (0.064, 0.117)         | 0.019 (0.082, 0.819)         | -0.079 (0.076, 0.299)       |
| FGF20    | rs591323   | 0.012 (0.077, 0.880)         | -0.014 (0.071, 0.840)        | 0.000 (0.091, 0.999)         | 0.045 (0.084, 0.592)        |
| CCDC62   | rs12817488 | <b>0.518 (0.176, 0.003)</b>  | <b>0.332 (0.162, 0.040)</b>  | -0.141 (0.208, 0.499)        | 0.254 (0.192, 0.186)        |
| LRRK2    | rs1491942  | 0.073 (0.085, 0.391)         | -0.098 (0.078, 0.208)        | 0.067 (0.101, 0.508)         | -0.138 (0.092, 0.133)       |
| SETD1A   | rs4889603  | -0.018 (0.068, 0.793)        | -0.015 (0.063, 0.808)        | 0.092 (0.081, 0.257)         | 0.018 (0.074, 0.811)        |
| MAPT     | rs2942168  | <b>0.312 (0.082, 0.0002)</b> | <b>0.156 (0.076, 0.041)</b>  | 0.130 (0.096, 0.175)         | 0.136 (0.089, 0.127)        |
| SREBF1   | rs11868035 | 0.069 (0.081, 0.398)         | <b>-0.210 (0.075, 0.005)</b> | -0.108 (0.095, 0.258)        | -0.136 (0.088, 0.124)       |
| RIT2     | rs12456492 | 0.013 (0.072, 0.855)         | -0.005 (0.066, 0.941)        | -0.081 (0.086, 0.349)        | 0.023 (0.079, 0.770)        |

Based on linear (bradykinesia, gait) or logistic (rigidity, tremor) regression models examining the level of parkinsonian features to PD SNP genotypes. Estimates (SE, p-value) are based on the effect of increasing dosage of the SNP reference allele, after adjustment for age and gender.

**eTable 4: Associations with other motor traits.**

| <b>LOCUS</b> | <b>Purdue Pegboard</b> | <b>Finger Taps</b>    | <b>Gait (Speed)</b>   | <b>Gait (Steps)</b>    | <b>Turn (Speed)</b>   | <b>Turn (Steps)</b>   |
|--------------|------------------------|-----------------------|-----------------------|------------------------|-----------------------|-----------------------|
| PARK16       | 0.013 (0.026, 0.617)   | -0.006 (0.022, 0.788) | 0.094 (0.040, 0.018)  | 0.074 (0.026, 0.005)   | 0.079 (0.063, 0.211)  | 0.045 (0.042, 0.286)  |
| STK39        | -0.014 (0.010, 0.173)  | -0.007 (0.009, 0.450) | -0.007 (0.016, 0.651) | -0.003 (0.010, 0.766)  | -0.004 (0.024, 0.875) | -0.006 (0.016, 0.703) |
| ACMSD        | -0.065 (0.035, 0.060)  | -0.058 (0.030, 0.050) | -0.019 (0.053, 0.719) | -0.039 (0.035, 0.268)  | -0.064 (0.082, 0.440) | -0.015 (0.055, 0.778) |
| MCCC1        | 0.023 (0.010, 0.018)   | -0.010 (0.008, 0.217) | -0.012 (0.015, 0.425) | 0.001 (0.010, 0.921)   | -0.057 (0.022, 0.011) | -0.032 (0.015, 0.032) |
| NMD3         | 0.0005 (0.007, 0.945)  | 0.002 (0.006, 0.742)  | -0.009 (0.011, 0.412) | -0.004 (0.007, 0.630)  | 0.008 (0.017, 0.645)  | 0.017 (0.011, 0.145)  |
| SNCA         | -0.002 (0.008, 0.832)  | 0.003 (0.007, 0.631)  | 0.013 (0.012, 0.283)  | -0.0003 (0.008, 0.973) | 0.007 (0.018, 0.698)  | -0.008 (0.012, 0.501) |
| GAK          | -0.009 (0.011, 0.388)  | 0.006 (0.009, 0.543)  | 0.006 (0.016, 0.719)  | 0.014 (0.011, 0.197)   | 0.015 (0.026, 0.562)  | 0.013 (0.017, 0.441)  |
| BST1         | -0.013 (0.007, 0.057)  | 0.003 (0.006, 0.621)  | -0.012 (0.010, 0.252) | -0.0005 (0.007, 0.943) | -0.019 (0.016, 0.220) | -0.005 (0.010, 0.645) |
| FAM47E       | -0.007 (0.007, 0.293)  | -0.003 (0.006, 0.561) | 0.018 (0.010, 0.079)  | 0.017 (0.007, 0.016)   | 0.002 (0.016, 0.920)  | -0.004 (0.011, 0.671) |
| HLA-DRB5     | -0.011 (0.007, 0.108)  | -0.003 (0.006, 0.669) | -0.005 (0.010, 0.653) | 0.0001 (0.007, 0.988)  | -0.010 (0.016, 0.527) | -0.002 (0.011, 0.832) |
| GPNMB        | -0.003 (0.007, 0.640)  | 0.006 (0.006, 0.283)  | -0.018 (0.011, 0.080) | -0.018 (0.007, 0.008)  | -0.039 (0.016, 0.016) | -0.015 (0.011, 0.175) |
| FGF20        | -0.0003 (0.008, 0.972) | -0.003 (0.007, 0.664) | 0.007 (0.012, 0.530)  | 0.001 (0.008, 0.926)   | 0.013 (0.019, 0.469)  | 0.004 (0.012, 0.750)  |
| CCDC62       | -0.018 (0.017, 0.309)  | -0.032 (0.015, 0.036) | -0.041 (0.027, 0.120) | -0.027 (0.018, 0.130)  | -0.038 (0.041, 0.354) | -0.032 (0.027, 0.248) |
| LRRK2        | 0.006 (0.008, 0.438)   | -0.007 (0.007, 0.360) | 0.008 (0.013, 0.513)  | 0.009 (0.008, 0.266)   | 0.027 (0.020, 0.178)  | 0.009 (0.013, 0.485)  |
| SETD1A       | 0.0004 (0.007, 0.955)  | -0.007 (0.006, 0.242) | 0.002 (0.010, 0.837)  | 0.013 (0.007, 0.048)   | 0.013 (0.016, 0.419)  | 0.015 (0.011, 0.167)  |
| MAPT         | -0.003 (0.008, 0.755)  | -0.005 (0.007, 0.452) | -0.004 (0.013, 0.762) | -0.001 (0.008, 0.877)  | -0.001 (0.020, 0.953) | -0.017 (0.013, 0.178) |
| SREBF1       | 0.005 (0.008, 0.507)   | -0.011 (0.007, 0.105) | 0.008 (0.012, 0.516)  | 0.002 (0.008, 0.768)   | 0.015 (0.019, 0.442)  | 0.007 (0.013, 0.565)  |
| RIT2         | -0.007 (0.007, 0.348)  | -0.006 (0.006, 0.341) | 0.005 (0.011, 0.628)  | 0.011 (0.007, 0.130)   | -0.003 (0.017, 0.857) | -0.003 (0.011, 0.760) |

Based on linear regression models examining the level of motor performance tasks to PD SNP genotypes. Estimates (SE, p-value) are based on the effect of increasing dosage of the SNP reference allele, after adjustment for age and gender.

**eTable 5: Associations with Nigral Pathology**

| <b>LOCUS</b> | <b>SNP</b> | <b>Lewy Bodies</b>    | <b>Nigral loss</b>    |
|--------------|------------|-----------------------|-----------------------|
| PARK16       | rs11240572 | 0.225 (0.510, 0.660)  | 0.043 (0.396, 0.913)  |
| STK39        | rs2102808  | 0.103 (0.195, 0.598)  | 0.135 (0.155, 0.383)  |
| ACMSD        | rs6710823  | -0.490 (0.631, 0.438) | -0.149 (0.511, 0.771) |
| MCCC1        | rs11711441 | -0.016 (0.173, 0.926) | 0.010 (0.139, 0.941)  |
| NMD3         | rs34016896 | 0.084 (0.140, 0.552)  | 0.245 (0.113, 0.031)  |
| SNCA         | rs356220   | 0.004 (0.148, 0.978)  | -0.105 (0.118, 0.374) |
| GAK          | rs1564282  | -0.128 (0.184, 0.488) | -0.132 (0.149, 0.378) |
| BST1         | rs4698412  | 0.060 (0.128, 0.641)  | -0.137 (0.102, 0.179) |
| FAM47E       | rs6812193  | 0.069 (0.129, 0.593)  | 0.191 (0.104, 0.065)  |
| HLA-DRB5     | rs3129882  | 0.004 (0.129, 0.978)  | -0.020 (0.103, 0.848) |
| GPNMB        | rs156429   | 0.086 (0.131, 0.510)  | -0.057 (0.103, 0.582) |
| FGF20        | rs591323   | -0.136 (0.136, 0.320) | -0.092 (0.110, 0.401) |
| CCDC62       | rs12817488 | -0.415 (0.326, 0.204) | -0.390 (0.260, 0.134) |
| LRRK2        | rs1491942  | -0.172 (0.154, 0.266) | -0.214 (0.124, 0.085) |
| SETD1A       | rs4889603  | 0.088 (0.126, 0.484)  | -0.176 (0.099, 0.076) |
| MAPT         | rs2942168  | 0.069 (0.148, 0.640)  | -0.202 (0.123, 0.100) |
| SREBF1       | rs11868035 | -0.171 (0.149, 0.251) | -0.062 (0.120, 0.606) |
| RIT2         | rs12456492 | 0.113 (0.131, 0.387)  | 0.047 (0.105, 0.654)  |

Based on logistic regression models examining the presence of Lewy bodies or severity of nigral neuronal loss to PD SNP genotypes. Estimates (SE, p-value) are based on the effect of increasing dosage of the SNP reference allele, after adjustment for age and gender.

**eTable 6: Associations with Alzheimer’s disease (AD) and cerebrovascular pathology.**

| <b>LOCUS</b> | <b>AD Pathology</b>   | <b>Gross Infarcts</b> | <b>Microscopic Infarcts</b> |
|--------------|-----------------------|-----------------------|-----------------------------|
| PARK16       | 0.123 (0.076, 0.108)  | -0.345 (0.406, 0.396) | 0.236 (0.448, 0.599)        |
| STK39        | 0.015 (0.030, 0.628)  | 0.069 (0.162, 0.670)  | 0.011 (0.170, 0.949)        |
| ACMSD        | -0.021 (0.101, 0.832) | -0.148 (0.540, 0.785) | 0.616 (0.582, 0.290)        |
| MCCC1        | 0.027 (0.027, 0.315)  | -0.022 (0.146, 0.879) | 0.166 (0.159, 0.296)        |
| NMD3         | -0.019 (0.022, 0.389) | -0.050 (0.117, 0.669) | -0.097 (0.123, 0.432)       |
| SNCA         | 0.004 (0.023, 0.869)  | 0.110 (0.125, 0.380)  | -0.201 (0.131, 0.124)       |
| GAK          | -0.002 (0.030, 0.949) | -0.232 (0.157, 0.141) | -0.109 (0.166, 0.511)       |
| BST1         | 0.020 (0.020, 0.320)  | -0.110 (0.107, 0.306) | -0.029 (0.113, 0.800)       |
| FAM47E       | -0.001 (0.020, 0.953) | 0.074 (0.108, 0.494)  | 0.086 (0.114, 0.452)        |
| HLA-DRB5     | -0.021 (0.020, 0.289) | -0.011 (0.108, 0.918) | 0.123 (0.115, 0.285)        |
| GPNMB        | -0.011 (0.020, 0.592) | 0.129 (0.110, 0.239)  | 0.063 (0.115, 0.588)        |
| FGF20        | 0.010 (0.022, 0.659)  | -0.039 (0.116, 0.739) | 0.119 (0.125, 0.337)        |
| CCDC62       | 0.042 (0.051, 0.412)  | 0.164 (0.274, 0.550)  | -0.183 (0.289, 0.526)       |
| LRRK2        | -0.039 (0.025, 0.121) | 0.168 (0.136, 0.214)  | -0.002 (0.141, 0.990)       |
| SETD1A       | -0.002 (0.019, 0.930) | -0.084 (0.105, 0.425) | 0.181 (0.112, 0.106)        |
| MAPT         | 0.008 (0.024, 0.730)  | 0.136 (0.125, 0.276)  | 0.149 (0.131, 0.254)        |
| SREBF1       | -0.002 (0.024, 0.922) | -0.163 (0.126, 0.198) | -0.160 (0.133, 0.227)       |
| RIT2         | -0.031 (0.021, 0.136) | 0.066 (0.111, 0.551)  | -0.179 (0.120, 0.136)       |

Based on linear (global AD pathology) or logistic (gross or microscopic infarcts) regression models examining the relation of postmortem indices to PD SNP genotypes. Estimates (SE, p-value) are based on the effect of increasing dosage of the SNP reference allele, after adjustment for age at death and gender.
